# Supplementary material
Source: HighWire-hosted journal article supplement (https://www.annfammed.org/highwire/filestream/8980/field_highwire_adjunct_files/0/Weatherburn_Supp.pdf)
Supplement: Weatherburn_Supp.pdf [file Weatherburn_Supp.pdf]

## Supplemental materials for:

Weatherburn C, Hasan S, Watts M, Shaw D. Mentored training positions for early career general practitioners. *Ann Fam Med*. 2018;16(5):466.

Christopher James Weatherburn, MBChB, MRCP, MRCPGP<sup>1</sup>

Shawkat Hasan, MBChB, FRCGP, MAcadMEd<sup>2</sup>

Michelle Watts, MBChB, FRCGP<sup>2</sup>

David Shaw, MBChB, FRCGP<sup>1</sup>

<sup>1</sup>Dundee Health & Social Care Partnership, Dundee, United Kingdom

<sup>2</sup>NHS Tayside, Scotland

Submitted August 8, 2017; submitted, revised, January 5, 2018; accepted February 14, 2018.

## References

1. Verma P, Ford JA, Stuart A, Howe A, Everington S, Steel N. A systematic review of strategies to recruit and retain primary care doctors. *BMC Health Serv Res*. 2016;16:126.

2. Job description.

<https://jobs.scot.nhs.uk/uploads/75/Career%20Start%20GP%20Posts%20Application%20Pack%202017.pdf>. Accessed Feb 28, 2018.

3. Van Ham I, Verhoeven AA, Groenier KH, Groothoff JW, De Haan J. Job satisfaction among general practitioners: a systematic literature review. *Eur J Gen Pract*. 2006;12(4):174-180.

4. Marchand C, Peckham S. Addressing the crisis of GP recruitment and retention: a systematic review. *Br J Gen Pract*. 2017;67(657):e227-e237.

**Prior presentations:** Some of the information was presented as a poster at the AEDGS conference January 2018.

**Acknowledgments:** The authors would like to thank the Scottish Government for supporting these positions.
